# Supplementary material
Source: Research Square preprint supplement (doi:10.21203/rs.3.rs-6356359/v1)
Supplement: Supplementary file 1 [file 660a8fd6045aab7c14e54416.docx]

Table S1. TIMA data. The total is less than 100% because trace phases (< 1%) and porosity/holes are not included. Mineral abbreviations are after Whitney and Evans (2010)

|  | **Qtz** | **Ms** | **Bt** | **Fsp** | **Grt** | **Chl** | **Cal** | **Ank** | **Total** |
| --- | --- | --- | --- | --- | --- | --- | --- | --- | --- |
| **ba7c** | 42 | 22 | 10 | 9 | 3 | 2 | 0 | 0 | 87 |
| **ba8a** | 50 | 11 | 7 | 15 | 0 | 3 | 2 | 0 | 88 |
| **ba8b** | 55 | 10 | 0 | 18 | 0 | 0 | 0 | 0 | 83 |
| **ba9a** | 43 | 10 | 6 | 12 | 0 | 5 | 6 | 4 | 86 |
| **ba9c** | 57 | 8 | 2 | 11 | 0 | 0 | 0 | 5 | 84 |
| **ba10a** | 56 | 10 | 2 | 10 | 1 | 0 | 0 | 5 | 85 |
| **ba10b** | 45 | 15 | 6 | 9 | 0 | 0 | 0 | 0 | 74 |
